# Supplementary material for: Colloidal graphenes as heterogeneous additives to enhance protein crystal yield
Source: Royal Society of Chemistry journal article supplement (doi:10.1039/c2nr31150j), 2012-01-01
Supplement: c2nr31150j.pdf [file c2nr31150j.pdf]

# Colloidal graphenes as heterogeneous additive to enhance protein crystal yield

Benjamin S. Gully,<sup>a,b</sup> Jianli Zou,<sup>a</sup> Gemma Cadby,<sup>c</sup> Daniel M. Passon,<sup>b</sup> K. Swaminathan Iyer<sup>\*a</sup> and Charles S. Bond<sup>\*b</sup>

## Supplementary Material

Table 2

---

The results of Miniaturized 96 well sparse matrix vapour diffusion trials were undertaken with Hampton Research crystal screen 1&2 in ratios of 200:200:50nL of protein solution:crystallisation condition:additive solution (at 20  $\mu\text{g.mL}^{-1}$ ). Monitoring for crystalline material forming conditions (CCMs). CCMs are inclusive of definite clear micro-crystals, needles or needle clusters, rods and single crystals. A scale commonly used in crystallization to grade the drops as clear, amorphous precipitate, crystalline precipitate, quasi crystalline/phase separation and a condition containing crystalline material was implemented, for examples see [http://hamptonresearch.com/documents/growth\\_101/9.pdf](http://hamptonresearch.com/documents/growth_101/9.pdf).

|                     | ADH |                         | catalase |                         | lysozyme |                         | trypsin |                         | PSPCI/NONO |                         |
|---------------------|-----|-------------------------|----------|-------------------------|----------|-------------------------|---------|-------------------------|------------|-------------------------|
|                     | clr | amo pre quasi cry total | clr      | amo pre quasi cry total | clr      | amo pre quasi cry total | clr     | amo pre quasi cry total | clr        | amo pre quasi cry total |
| control 1           | 6.0 | 47.0 40.0 2.0 1.0 96.0  | 78.0     | 10.0 4.0 2.0 2.0 96.0   | 63.0     | 14.0 6.0 1.0 12.0 96.0  | 50.0    | 16.0 23.0 5.0 2.0 96.0  | 4.0        | 12.0 79.0 0.0 1.0 96.0  |
| control 2           | 6.0 | 47.0 39.0 2.0 2.0 96.0  | 79.0     | 9.0 4.0 2.0 2.0 96.0    | 62.0     | 14.0 6.0 1.0 13.0 96.0  | 50.0    | 16.0 22.0 6.0 2.0 96.0  | 4.0        | 13.0 78.0 0.0 1.0 96.0  |
| control 3           | 6.0 | 47.0 40.0 2.0 1.0 96.0  | 79.0     | 9.0 4.0 2.0 2.0 96.0    | 65.0     | 13.0 7.0 2.0 9.0 96.0   | 51.0    | 16.0 22.0 5.0 2.0 96.0  | 4.0        | 11.0 79.0 0.0 2.0 96.0  |
| control mean        | 6.0 | 47.0 39.7 2.0 1.3 96.0  | 78.7     | 9.3 4.0 2.0 2.0 96.0    | 63.3     | 13.7 6.3 1.3 11.3 96.0  | 50.3    | 16.0 22.3 5.3 2.0 96.0  | 4.0        | 12.0 78.7 0.0 1.3 96.0  |
| SE                  |     | 0.3                     |          | 0.0                     |          | 1.2                     |         | 0.0                     |            | 0.3                     |
| graphene 1          | 2.0 | 30.0 59.0 1.0 4.0 96.0  | 78.0     | 5.0 6.0 2.0 5.0 96.0    | 59.0     | 8.0 11.0 2.0 16.0 96.0  | 44.0    | 13.0 28.0 8.0 3.0 96.0  | 2.0        | 6.0 86.0 0.0 2.0 96.0   |
| graphene 2          | 2.0 | 30.0 59.0 1.0 4.0 96.0  | 79.0     | 6.0 7.0 1.0 3.0 96.0    | 58.0     | 8.0 12.0 2.0 16.0 96.0  | 44.0    | 13.0 29.0 7.0 3.0 96.0  | 2.0        | 6.0 84.0 0.0 4.0 96.0   |
| graphene 3          | 2.0 | 30.0 60.0 1.0 3.0 96.0  | 79.0     | 6.0 7.0 1.0 3.0 96.0    | 62.0     | 7.0 12.0 2.0 13.0 96.0  | 44.0    | 14.0 29.0 7.0 2.0 96.0  | 2.0        | 5.0 87.0 0.0 2.0 96.0   |
| graphene mean       | 2.0 | 30.0 59.3 1.0 3.7 96.0  | 78.7     | 5.7 6.7 1.3 3.7 96.0    | 59.7     | 7.7 11.7 2.0 15.0 96.0  | 44.0    | 13.3 28.7 7.3 2.7 96.0  | 2.0        | 5.7 85.7 0.0 2.7 96.0   |
| SE                  |     | 0.3                     |          | 0.7                     |          | 1.0                     |         | 0.3                     |            | 0.7                     |
| graphene oxide 1    | 2.0 | 39.0 52.0 1.0 2.0 96.0  | 79.0     | 7.0 4.0 2.0 4.0 96.0    | 51.0     | 8.0 21.0 4.0 12.0 96.0  | 42.0    | 16.0 28.0 6.0 4.0 96.0  | 3.0        | 14.0 74.0 0.0 5.0 96.0  |
| graphene oxide 2    | 2.0 | 39.0 52.0 1.0 2.0 96.0  | 78.0     | 6.0 5.0 2.0 5.0 96.0    | 50.0     | 7.0 20.0 4.0 15.0 96.0  | 43.0    | 15.0 28.0 6.0 4.0 96.0  | 3.0        | 13.0 75.0 0.0 5.0 96.0  |
| graphene oxide 3    | 2.0 | 39.0 52.0 1.0 2.0 96.0  | 79.0     | 7.0 5.0 2.0 3.0 96.0    | 53.0     | 7.0 20.0 4.0 12.0 96.0  | 42.0    | 16.0 28.0 6.0 4.0 96.0  | 3.0        | 11.0 79.0 0.0 3.0 96.0  |
| graphene oxide mean | 2.0 | 39.0 52.0 1.0 2.0 96.0  | 78.7     | 6.7 4.7 2.0 4.0 96.0    | 51.3     | 7.3 20.3 4.0 13.0 96.0  | 42.3    | 15.7 28.0 6.0 4.0 96.0  | 3.0        | 12.7 76.0 0.0 4.3 96.0  |
| SE                  |     | 0.0                     |          | 0.6                     |          | 1.0                     |         | 0.0                     |            | 0.7                     |

Table 3

Analysis of variance table used to determine p-values using transformed data. The data was transformed by dividing the CCM by 96 (the number of trials), taking the square root and then the arcsine. DF denotes the degrees of freedom associated with the source of variance. Sum sq. denotes the sum of squares associated with the sources of variance, Total, Model and Error. Mean sq denotes the mean square, (Sum sq./DF). F value is the F-statistic (Mean Square Model divided by the Mean Square Error). The Pr (> F) denotes the p-value associated with the F-statistic. It is used in testing the null hypothesis that all means are equal.

|                   | DF | Sum sq. | Mean sq.  | F value  | Pr(>F)    |
|-------------------|----|---------|-----------|----------|-----------|
| Protein           | 4  | 0.32033 | 0.0800082 | 148.6923 | <2.2e-16  |
| Treatment         | 2  | 0.02801 | 0.014004  | 26.0013  | 2.815e-07 |
| Protein:treatment | 8  | 0.01233 | 0.001541  | 2.8606   | 0.01724   |
| Residuals         | 30 | 0.01616 | 0.000539  |          |           |

Table 4

Details of diffraction data collected from three lysozyme crystals grown with addition of either graphene or GO at a final concentration of 33  $\mu\text{g.mL}^{-1}$ , or a water-only control.

|                                            |   | lysozyme control       | lysozyme and graphene  | lysozyme and graphene oxide |
|--------------------------------------------|---|------------------------|------------------------|-----------------------------|
| Space group                                |   | $P 4_3 2_1 2$          | $P 4_3 2_1 2$          | $P 4_3 2_1 2$               |
| Cell Dimensions                            | Å | $a=78.99, c=36.96$     | $a=78.68, c=37.35$     | $a=78.83, 36.96$            |
| Resolution limits (highest resolution bin) | Å | 78.99-1.36 (1.43-1.36) | 78.68-1.67 (1.76-1.67) | 78.83-1.53 (1.61-1.53)      |
| $R_{\text{pim}}^*$                         |   | 0.02 (0.11)            | 0.02 (0.20)            | 0.02 (0.11)                 |
| Mean ((I)/sd(I))                           |   | 23.4(6.6)              | 33.5(3.7)              | 28.3(5.8)                   |
| Completeness                               | % | 99.8(98.7)             | 99.6 (97.6)            | 99.8 (99.0)                 |
| Multiplicity                               |   | 13.4 (13.5)            | 13.0 (9.9)             | 11.7 (9.9)                  |

\* Precision-indicating R-factor
